# Supplementary material
Source: publisher site journal article supplement (https://www.dovepress.com/article/415714)
Supplement: Supplementary file 1 [file get_supplementary_file.php]

**Supplementary Table 1. Patient and surgical characteristics by sex**

|  | **Women** | **Men** | **Standardized difference** |
| --- | --- | --- | --- |
| **Characteristic** | **(n=332)** | **(n=315)** |
| Age (years), mean ± SD | 73.6 ± 6.0 | 73.5 ± 5.8 | 0.028 |
| BMI (kg/m2), mean ± SD | 29.1 ± 6.3 | 28.9 ± 4.3 | 0.051 |
| ASA, n (%) |  |  | -0.074 |
| 2 | 123 (37.0) | 106 (33.7) |  |
| 3 | 205 (61.7) | 204 (64.8) |  |
| 4 | 4 (1.2) | 5 (1.6) |  |
| Reoperation, n (%) | 17 (5.1) | 22 (7) | -0.078 |
| Surgical invasiveness tier*, n (%) |  |  | 0.268 |
| 1 | 10 (3.0) | 14 (4.4) |  |
| 2 | 92 (27.7) | 125 (39.7) |  |
| 3 | 198 (59.6) | 153 (48.6) |  |
| 4 | 32 (9.6) | 23 (7.3) |  |
| Preoperative opioid use, n (%) | 137 (41.3) | 103 (32.7) | 0.178 |
| History of anxiety, n (%) | 64 (19.3) | 14 (4.4) | 0.471 |
| Anxiolytic use, n (%) | 93 (28.0) | 53 (16.8) | 0.271 |
| History of depression, n (%) | 68 (20.5) | 39 (12.4) | 0.220 |
| Antidepressant use, n (%) | 125 (37.7) | 70 (22.2) | 0.342 |

*Tier 1: microdiscectomy, tier 2: lumbar laminectomy, anterior cervical procedures, or minimally invasive fusions, tier 3: lumbar fusion, trauma, or posterior cervical fusion procedures, and tier 4: tumor, infection, deformity, or combined anterior and posterior cervical procedures

Standardized difference with absolute value greater than or equal to 0.1 were taken to indicate a greater difference between groups than would be expected by chance

**Supplementary Table 2. Assessment of the association of preoperative anxiety and depression indicators with opioid consumption 0-24, 24-48, and 48-72 hours after elective spine surgery among men and women combined**

| **Postoperative time (hours)** | **n** | **Opioid consumption (MME), mean ± SD** | **n** | **Opioid consumption (MME), mean ± SD** | **Adjusted difference in means (99.6% CI)** | **P value** |
| --- | --- | --- | --- | --- | --- | --- |
|  | **Preoperative history of anxiety** | | | |  |  |
|  | **Yes** | | **No** | |  |  |
| 0-24 | 78 | 33.8 ± 28.0 | 569 | 24.5 ± 17.9 | 6.6 (1.1, 12.0) | <0.001 |
| 24-48 | 69 | 16.6 ± 18.8 | 495 | 11.3 ± 12.2 | 2.2 (-3.5, 7.8) | 0.271 |
| 48-72 | 56 | 15.8 ± 21.2 | 352 | 9.3 ± 10.5 | 4.3 (-1.6, 10.3) | 0.037 |
|  | **Preoperative anxiolytic use** | | | |  |  |
|  | **Yes** | | **No** | |  |  |
| 0-24 | 146 | 29.3 ± 22.4 | 501 | 24.5 ± 18.6 | 1.0 (-3.1, 5.1) | 0.496 |
| 24-48 | 124 | 14.0 ± 16.6 | 440 | 11.4 ± 12.1 | -1.5 (-5.8, 2.8) | 0.331 |
| 48-72 | 90 | 13.3 ± 15.8 | 318 | 9.3 ± 11.5 | 0.7 (-4.0, 5.5) | 0.658 |
|  | **Preoperative history of depression** | | | |  |  |
|  | **Yes** | | **No** | |  |  |
| 0-24 | 107 | 32.6 ± 24.5 | 540 | 24.2 ± 18.2 | 5.0 (0.3, 9.7) | 0.002 |
| 24-48 | 91 | 13.9 ± 14.1 | 473 | 11.6 ± 13.1 | -1.6 (-6.5, 3.4) | 0.361 |
| 48-72 | 71 | 14.3 ± 18.1 | 337 | 9.3 ± 11.0 | 1.5 (-3.8, 6.9) | 0.415 |
|  | **Preoperative antidepressant use** | | | |  |  |
|  | **Yes** | | **No** | |  |  |
| 0-24 | 195 | 30.4 ± 24.2 | 452 | 23.5 ± 16.8 | 4.3 (0.6, 8.0) | <0.001 |
| 24-48 | 171 | 15.0 ± 17.8 | 393 | 10.6 ± 10.5 | 1.5 (-2.4, 5.3) | 0.271 |
| 48-72 | 130 | 13.1 ± 17.8 | 278 | 8.8 ± 9.1 | 1.1 (-3.1, 5.3) | 0.457 |

Adjusted differences in mean opioid consumption with corresponding confidence intervals and P values were calculated for the comparison of patients with and without each preoperative anxiety or depression indicator using linear mixed-effects models each containing parameters for preoperative history of anxiety (except when testing anxiolytic use), anxiolytic use (except when testing history of anxiety), history of depression (except when testing antidepressant use), antidepressant use (except when testing history of depression), age, BMI, ASA physical status, surgical invasiveness tier, reoperation, preoperative opioid use, postoperative timepoint, and an interactions between the anxiety or depression indicator and postoperative timepoint. Each comparison was evaluated at a Bonferroni-corrected two-sided alpha-level of 0.05/12=0.004.

**Supplementary Table 3. Assessment of the association of preoperative anxiety and depression indicators with highest pain severity 0-24, 24-48, and 48-72 hours after elective spine surgery among men and women combined**

| **Postoperative time (hours)** | **n** | **Highest NRS pain score, mean ± SD** | **n** | **Highest NRS pain score, mean ± SD** | **Adjusted difference in means (99.6% CI)** | **P value** |
| --- | --- | --- | --- | --- | --- | --- |
|  | **Preoperative history of anxiety** | | | |  |  |
|  | **Yes** | | **No** | |  |  |
| 0-24 | 78 | 8.1 ± 1.9 | 558 | 7.2 ± 2.3 | 0.4 (-0.5, 1.2) | 0.206 |
| 24-48 | 69 | 7.5 ± 2.2 | 479 | 6.6 ± 2.2 | 0.4 (-0.4, 1.3) | 0.169 |
| 48-72 | 54 | 7.4 ± 1.9 | 329 | 6.3 ± 2.4 | 0.7 (-0.2, 1.6) | 0.034 |
|  | **Preoperative anxiolytic use** | | | |  |  |
| **Postoperative time (hours)** | **Yes** | | **No** | | **Adjusted difference in means (99.6% CI)** |  |
| **n** | **Highest NRS pain score, mean ± SD** | **n** | **Highest NRS pain score, mean ± SD** | **P value** |
| 0-24 | 144 | 7.7 ± 2.1 | 492 | 7.2 ± 2.3 | 0.1 (-0.6, 0.7) | 0.806 |
| 24-48 | 119 | 7.0 ± 2.1 | 429 | 6.6 ± 2.3 | 0 (-0.7, 0.7) | 0.979 |
| 48-72 | 85 | 7.0 ± 1.8 | 298 | 6.3 ± 2.5 | 0.4 (-0.3, 1.1) | 0.123 |
|  | **Preoperative history of depression** | | | |  |  |
| **Postoperative time (hours)** | **Yes** | | **No** | | **Adjusted difference in means (99.6% CI)** |  |
| **n** | **Highest NRS pain score, mean ± SD** | **n** | **Highest NRS pain score, mean ± SD** | **P value** |
| 0-24 | 106 | 7.9 ± 2.0 | 530 | 7.2 ± 2.3 | 0.3 (-0.4, 1) | 0.266 |
| 24-48 | 91 | 7.2 ± 2.2 | 457 | 6.6 ± 2.3 | 0.2 (-0.5, 1) | 0.341 |
| 48-72 | 66 | 6.9 ± 2.3 | 317 | 6.4 ± 2.3 | 0.2 (-0.6, 1) | 0.481 |
|  | **Preoperative antidepressant use** | | | |  |  |
| **Postoperative time (hours)** | **Yes** | | **No** | | **Adjusted difference in means (99.6% CI)** |  |
| **n** | **Highest NRS pain score, mean ± SD** | **n** | **Highest NRS pain score, mean ± SD** | **P value** |
| 0-24 | 192 | 7.6 ± 2.3 | 444 | 7.2 ± 2.3 | 0 (-0.5, 0.6) | 0.863 |
| 24-48 | 166 | 6.9 ± 2.3 | 382 | 6.6 ± 2.2 | 0 (-0.6, 0.6) | 0.964 |
| 48-72 | 122 | 7.0 ± 2.1 | 261 | 6.2 ± 2.4 | 0.3 (-0.4, 1) | 0.197 |

Adjusted differences in mean highest pain severity with corresponding confidence intervals and P values were calculated for the comparison of patients with and without each preoperative anxiety or depression indicator using linear mixed-effects models each containing parameters for preoperative history of anxiety (except when testing anxiolytic use), anxiolytic use (except when testing history of anxiety), history of depression (except when testing antidepressant use), antidepressant use (except when testing history of depression), age, BMI, ASA physical status, surgical invasiveness tier, reoperation, preoperative opioid use, postoperative timepoint, and an interactions between the anxiety or depression indicator and postoperative timepoint. Each comparison was evaluated at a Bonferroni-corrected two-sided alpha-level of 0.05/12=0.004.

**Supplementary Table 4. Assessment of the association of preoperative anxiety and depression indicators with average pain severity 0-24, 24-48, and 48-72 hours after elective spine surgery among men and women combined**

| **Postoperative time (hours)** | **n** | **Average NRS pain score, mean ± SD** | **n** | **Average NRS pain score, mean ± SD** | **Adjusted difference in means (99.6% CI)** | **P value** |
| --- | --- | --- | --- | --- | --- | --- |
|  | **Preoperative history of anxiety** | | | |  |  |
|  | **Yes** | | **No** | |  |  |
| 0-24 | 78 | 5.5 ± 1.6 | 557 | 4.6 ± 1.9 | 0.5 (-0.2, 1.1) | 0.047 |
| 24-48 | 69 | 5.1 ± 1.9 | 478 | 4.0 ± 1.7 | 0.7 (0, 1.4) | 0.006 |
| 48-72 | 54 | 5.1 ± 2.1 | 329 | 3.9 ± 1.9 | 0.7 (-0.1, 1.4) | 0.009 |
|  | **Preoperative anxiolytic use** | | | |  |  |
|  | **Yes** | | **No** | |  |  |
| 0-24 | 143 | 5.2 ± 1.8 | 492 | 4.5 ± 1.9 | 0.2 (-0.3, 0.7) | 0.186 |
| 24-48 | 118 | 4.7 ± 1.8 | 429 | 4.0 ± 1.8 | 0.3 (-0.2, 0.8) | 0.116 |
| 48-72 | 85 | 4.7 ± 1.8 | 298 | 3.9 ± 2.0 | 0.3 (-0.3, 0.9) | 0.098 |
|  | **Preoperative history of depression** | | | |  |  |
|  | **Yes** | | **No** | |  |  |
| 0-24 | 105 | 5.3 ± 1.8 | 530 | 4.5 ± 1.9 | 0.3 (-0.3, 0.9) | 0.155 |
| 24-48 | 90 | 4.7 ± 1.9 | 457 | 4.1 ± 1.8 | 0.2 (-0.5, 0.8) | 0.456 |
| 48-72 | 66 | 4.7 ± 2.2 | 317 | 4.0 ± 1.9 | 0.2 (-0.5, 0.9) | 0.408 |
|  | **Preoperative antidepressant use** | | | |  |  |
|  | **Yes** | | **No** | |  |  |
| 0-24 | 191 | 5.1 ± 1.9 | 444 | 4.5 ± 1.8 | 0.2 (-0.2, 0.7) | 0.131 |
| 24-48 | 165 | 4.5 ± 2.0 | 382 | 4.0 ± 1.7 | 0.1 (-0.4, 0.5) | 0.704 |
| 48-72 | 122 | 4.7 ± 2.0 | 261 | 3.8 ± 1.9 | 0.4 (-0.2, 0.9) | 0.052 |

Adjusted differences in mean average pain severity with corresponding confidence intervals and P values were calculated for the comparison of patients with and without each preoperative anxiety or depression indicator using linear mixed-effects models each containing parameters for preoperative history of anxiety (except when testing anxiolytic use), anxiolytic use (except when testing history of anxiety), history of depression (except when testing antidepressant use), antidepressant use (except when testing history of depression), age, BMI, ASA physical status, surgical invasiveness tier, reoperation, preoperative opioid use, postoperative timepoint, and an interactions between the anxiety or depression indicator and postoperative timepoint. Each comparison was evaluated at a Bonferroni-corrected two-sided alpha-level of 0.05/12=0.004.
